# Supplementary material for: Identification of Tomato Ve1 Homologous Proteins in Flax and Assessment for Race-Specific Resistance in Two Fiber FlaxCultivars against Verticillium dahliae Race 1
Source: MDPI journal article supplement (doi:10.3390/plants10010162), 2021-01-15
Supplement: s1 [file s1]

## Supplemental data

**Figure S1.** Amino acids alignment through MUSCLE (Multiple Sequence Comparison by Log-Expectation) of the sequences used to generate the phylogram in **Figure 1**. According to BLOSUM62 matrix, the residues in color are the most conserved. Average BLOSUM62 score: low (0.5) in grey, mid (1.5) in turquoise and max (3.0) in blue.

```
HcrVf2_M.f      MERTmrsvllltrflaIat--tfsiglcngnpgwplCkvseRraLLmfKqdkl--Dpv-----nRLASvvaeddSDCCSwitGvVCDh-vtGHiheLhLNsSyd-
CF-9_S.pim      --mdcvklvflMlytlfclq---alssslphl-----CpeDQalsLLQfKNMft-inpNaSDYCYDrttyvdiqsyprtlSW-Nk-stsCCSwdGVhCde-ttGqVtALDLrcsqLq-
CF-4_S.hab      --mgcvklvfflMlytlfclq---vssssslphl-----CpeDQalaLLefKNMft-vnpNaSDYCYD-----rRtlSW-Nk-stsCCSwdGVhCde-ttGqVtALDLrcsqLq-
LEPR3_B.ju      MKgsvksfslipIsfcflfLrdefavparhl-----ChpqQReaileLKNeFqIqkpcS-----gwtvSW-an-NSDCCSwdGirCda-tfGdVieLnLgncILh-
LEPR3_B.na      MKgsvksfslipIsfcflfLrdefavparhl-----ChpqQReaileLKNeFhIqkpcS-----dRtvSW-vn-NSDCCSwdGirCda-tfGdVieLnLgncILh-
LEPR3_B.ra      MKgsaksIslipIsfcflfLrdefavparhl-----ChpqQReaileLKNeFqIqkpcS-----gwtvSW-vn-NSDCCSwdGirCda-tfGdVieLnLgncILy-
BAD68095.1      MastlpqLLiLiLiLiLYcsiqtvanttIipvh-----ChphQaealLLQKssFi-----n-----pnLSSW-kl-ntDCCNheGVTCdt-ssGqVtaLDLSyylnlqsp-
AES86946.1      --mrhivfLlffipfslIiSsnkfLVnGy-----ChghehSLLQLKNSli-FnpTKS-----skLvhW-NqsdDCCqmhGVTCdt--qGHVtLDLSqSIS-
GbVe_G.bar      --mtmspfswiffnafLvaaFftihlvVSGQ-----CqrDQgqLLLeLKss--FnsTsl-----gKlqkW-Nq-ttDCCfndGVTCdt--asGrVigLDLSNqSIS-
LuVe11_L.u      --mtsngltwflLmytLV-----GsqvgsVSGQ-----CaggQOSSLQLLKqgFnt-ssSSIS-----rnLArW-ds-sLDCCNmpGigCDpGglGrVtrLnLsGEMIT-
LuVe14_L.u      MKqqlqLlwyLlmpILYtl-----VSGR-----CagPQOSSLQLLKqgFntvssSSS-----rnLArW-ds-tiDCCNmpGigCDpGglGrVtrLnLsGEMIT-
LuVe12_L.u      MKlhlLaLsIVlVgsLVsl-----VSGR-----CagPQhSLLQLKqgLI-FDqSyS-----aKLAKW-Na-stDCCNmpGigCDpGglGrVtrLnLsGEMIT-
LuVe13_L.u      MKfqllaLsIVlVgtLVsl-----VSGR-----CagPQhSLLQLKqgLV-FDqSyS-----aKLsgW-Na-stDCCNmpGigCDpGglGrVtrLnLsGEMIT-
mVe1_M.lon      ---manLflsVlmisIita-TtfttIsySqQ-----ClhhQKTsLLQLKNeIk-FDSSNS-----tkLvwW-NrkNnDCCNmpGigCDpGglGrVtrLnLsGEMIT-
ACB99693.1      ---manLflsVlmisIita-TtfttIsySqQ-----ClhhQKTsLLQLKNeIk-FDSSNS-----tkLvwW-NrkNnDCCNmpGigCDpGglGrVtrLnLsGEMIT-
StVe_S.tor      ---mrflhflwLlflipfFqILSGieifLVsqQ-----ClDhQKSLLLKngtLIq-YDSSIS-----tkLArW-NqntSeCCNmpGigCDpGglGrVtrLnLsGEMIT-
S1Ve1_S.ly      MKmmttlyflwLlvpLFqILSGndifLVsqQ-----ClDQKSLLLQLKqSfQ-YDSTIS-----nKlerW-NhntSeCCNmpGigCDpGglGrVtrLnLsGEMIT-
Ve1_S.lyco      MKmmatlyflwLlvpLFqILSGyhiFVsqQ-----ClDQKSLLLQLKqSfQ-YDSTIS-----nKlAKW-NdmtSeCCNmpGigCDpGglGrVtrLnLsGEMIT-
AAT51733.1      MKmmatlyfpmVLlpslqLlSGyhiFVsqQ-----ClDQKSLLLQLKqSfQ-YDSTIS-----nKlAKW-NdmtSeCCNmpGigCDpGglGrVtrLnLsGEMIT-

HcrVf2_M.f      wefnfsggklnpsLlSLk---hLnYLDLSNndFNGTQIPs-ffGsmTslThNLNlayseLgiIPhKlgnLssLryLnLsSf-----ygsnLKVnL---qwIsG
CF-9_S.pim      GkfhS-----nSsLFqLs---nLkrLDLSFNnFtGSIIsp-kfGefsdLThLdLSHssFGIIPseichskLhVtricdq-----yglSLvpyNfEILLkN
CF-4_S.hab      GkfhS-----nSsLFqLs---nLkrLDLSFNnFtGSIIsp-kfGefsdLThLdLSHssFGIIPseichskLhVtricdq-----yglSLvpyNfEILLkN
LEPR3_B.ju      GeLns-----kntilkQLSPLFQaLDLSdNyFs-gnIPs-sLGNLskLTdLdLSKnaFGaIPssLgnLsnltLn-----eltfghNfEILLkN
LEPR3_B.na      GeLns-----kntilkQLSPLFQaLDLSdNyFs-gnIPs-sLGNLskLTdLdLSKnaFGaIPssLgnLsnltLn-----eltfghNfEILLkN
LEPR3_B.ra      GqLns-----kSIIlgfQSLPFLatLDLSdNyFs-gnvPs-sLGNLskLTdLdLSKnaFGaIPssLgnLsnltLn-----eltfghNfEILLkN
BAD68095.1      GGLD-----pAvFNlt---tLrnLsLagNdFNrtVlPsfGfqrLTklrLdLSeAGFGQIPigiahLknLraLDLSfn-----yLffqePsfQIVaL
AES86946.1      GGLD-----SSALFSLQ---YLQsLnLaFnhFr-SvIPq-dLhrLhNLrYLNLSNAGFGQvPeeiShLkRLVlDfSsk-----fisIqnLKLEKPNigmLVQV
GbVe_G.bar      GaIDD-----SSgLFrFQ---hLQgLnLaYnrIm-atFPT-GfdkLNLsYLNLSNAGFGQIPavISRmTRLVtLDLSv-----sllgrstLEKPKLELVQV
LuVe11_L.u      GGFdn-----SmaLFrLQ---YLQvLDLSFNsFd-rtIPA-GIGNLTLNkYLNLSNAGFGQIPaeiSsLKLVLdLSm1-----YfpgvLSKLEPNLsgLVkN
LuVe14_L.u      GGFgn-----SmaLFrLQ---YLQvLDLSFNnFN-TtpPa-GIGNLTLNkYLNLSNAGFGQIPaeiSsLKLVLdLSm1-----YfpgvLSKLEPNLsgLVkN
LuVe12_L.u      GGLD-----SkALFSLQ---YLQsLDLSNnyFN-TnvPn-dLanLTsLrYLNLSNAGFGQvPasISRmTSLVSLDLSfdqefmvlIdsfqdgtsnvypimslqyPNLgeLVEN
LuVe13_L.u      GGLnd-----SSsLFrLQ---YLQtdLMSFNyFq-TtvPi-nLanLTsLrYLNLSNAGFGQvPasISRmTSLVSLDLSfdqefmvlIdsfqdgtsnvypimslqyPNLgeLVEN
mVe1_M.lon      GGIDD-----SSsLFrLe---FLEKLnLaYnvFNrtQIPr-GIqNLTYLThNLNLSNAGFGQvPlqLSfLTRLVsLDIskf-----ddmgrPLeLrPNLsqLVQV
ACB99693.1      GGIDD-----SSsLFrLe---FLEKLnLaYnvFNrtQIPr-GIqNLTYLThNLNLSNAGFGQvPlqLSfLTRLVsLDIskf-----ddmgrPLeLrPNLsqLVQV
StVe_S.tor      sGIEEn-----SSALFSLQ---YLEKLnLaYnrFs-vgIPv-GISNLTLNkYLNLSNAGFGQIPmmlSRLTRLVtLDLStl-----rgrgiePKLErPNLEtLIQV
S1Ve1_S.ly      sGIEEn-----aSALFSLQ---YLEsLnLaYnkFN-vgIPv-GIGNLTLNkYLNLSNAGFGQIPmmlSRLTRLVtLDLStl-----rgrgiePKLErPNLEtLIQV
Ve1_S.lyco      sGIEEn-----SSALFSLQ---YLEsLnLadNmFN-vgIPv-GIaNLTLNkYLNLSNAGFGQIPitLSRLTRLVtLDLSti-----lPffdgPKLEPNLshfIEI
AAT51733.1      sGIEEn-----SSALFSLQ---YLEsLnLadNmFN-vgIPv-GIDNLTLNkYLNLSNAGFGQIPitLSRLTRLVtLDLSti-----lPffdgPKLEPNLshfIEI

HcrVf2_M.f      LsLkKhldLssVn1---skaSdWlQvt---nmLPsLveLdmSDCldqipltpnptfSLvLdLsrNSfncIprWvFsLkNLvSLhSfGgFQspiPsisqnt-sLreIDLsFNsIs1
CF-9_S.pim      LTQRLRELnLesVn1---SSTIPsnFs--ShLTLQlsgteLhGILPERVfHls-nQsLhLSvNpqlt
CF-4_S.hab      LTQRLKvldLesin1---SSTIPsnFs--ShLTLNwLpyteLRGILPERVfHls-dLEfLDLSNpqlt
LEPR3_B.ju      -----afnGeIPSSLgnLsNLTlIkLsqNkLigkiPpslgNLSyLThLTLcanNLvGeiPyylanLshhLtfLniceNs-fs
LEPR3_B.na      LigkipssL-----gnLsNLTlIkLsYnnlIGkiPSSLgnLsNLTlLnLsqNkLigkiPpslgNLSyLThLTLcanNLvGeiPyylanLshhLtfLniceNs-fs
LEPR3_B.ra      LsnLRELnLDqVn1---tseptvsvAla-hsLpLlqnLsLQcdLgeIhrrSfSqrSLvVINLnYngIsgrVPEFFAdFffLsdLaLsnNfEGqPtkIFQVe-nLrsLDvSfNptLf
BAD68095.1      LTditELyLDGvA1---SARGeWghpL---SllKglrVLSmSSCNLSGPIOSSlAKLQSLsIVkLsqNklftVpDWFNFNSNLTlLqLssCtLKGfPPKdIFIQth-tLkvLDmSNnqly
AES86946.1      LTKLKFhLDGvN1---ratGNEwCRAL---SsLtdLqVLSmSNCNLSGPIOSSlAKLQSLsIVkLsqNklftVpDWFNFNFNSNLTlLqLssCtLKGfPPKdIFIQth-tLkvLDmSNnqly
GbVe_G.bar      LgqVLDLrLDGVD1---SAQGNqWQALaDSSLqNLKLSmSNCFSLSGPFDSSlKLrSLSViRLDtnFefStpIPDFAdFgsLTVLrLrtCgLSgtFPakIFQIP-sLEVLDLSNngLlq
LuVe11_L.u      LgqVLDLrLDGVD1---SAQGNqWQALaDSSLqNLKLSmSNCFSLSGPFDSSlKLrSLSViRLDtnFefStpIPDFAdFgsLTVLrLrtCgLSgtFPakIFQIP-sLEVLDLSNngLlq
LuVe14_L.u      LgqVLDLrLDGVD1---SAQGNqWQALaDSSLqNLKLSmSNCFSLSGPFDSSlKLrSLSViRLDtnFefStpIPDFAdFgsLTVLrLrtCgLSgtFPakIFQIP-sLEVLDLSNngLlq
LuVe12_L.u      LTrLVdLrLDIVtItdhHQGNqWCEALS-SsLPNLeVLSmSNCLLpGDPpSLSKLQhLSVvqLDyNDFSSVPesFayFrNLTSLtmrdCgLKgtFPakIIQIP-sLEVLDLSNngLlq
LuVe13_L.u      LTrLVdLrLDIVtItdhHQGNqWCEALS-SsLPNLeVLSmSNCLLpGDPpSLSKLQhLSVvqLDyNDFSSVPesFayFrNLTSLtmrdCgLKgtFPakIIQIP-sLEVLDLSNngLlq
mVe1_M.lon      LsgLRELCdGVDV---SsQkSEWg1i1s-ScLPNirsLSLryCvsgSGPLheSLSKLQSLsIILdGhNLSVVPnFFANFSsLTTLSLknCsLEGSFPEmIFQKp-tLQnLDLSNngLlq
ACB99693.1      LsvLRELCdGVDV---SsQkSEWg1i1s-ScLPNirsLSLryCvsgSGPLheSLSKLQSLsIILdGhNLSVVPnFFANFSsLTTLSLknCsLEGSFPEmIFQKp-tLQnLDLSNngLlq
StVe_S.tor      sTeLRELyLDGVD1---SAQraEWQSLs-SyLPNLTVLSLrCqisSGPIDSLqLQSLsIILdGhNLSVVPnFFANFSsLTTLSLknCsLEGSFPEmIFQKp-tLQnLDLSNngLlq
S1Ve1_S.ly      sTeLRELyLDGVD1---SAQrtdwQSLs-SyLPNLTVLSLrCqisSGPIDSLqLQSLsIILdGhNLSVVPnFFANFSsLTTLSLknCsLEGSFPEmIFQKp-tLQnLDLSNngLlq
Ve1_S.lyco      sTeLRELyLDGVD1---SsQrtdwQSLs-SyLPNLTVLSLrCqisSGPIDSLqLQSLsIILdGhNLSVVPnFFANFSsLTTLSLknCsLEGSFPEmIFQKp-tLQnLDLSNngLlq
AAT51733.1      sTeLRELyLDGVD1---SsQrtdwQSLs-SyLPNLTVLSLrCqisSGPIDSLqLQSLsIILdGhNLSVVPnFFANFSsLTTLSLknCsLEGSFPEmIFQKp-tLQnLDLSNngLlq
```

[illegible]



HcrVf2\_M.f ---ssavDLsSNqftGaLPtVp-----t1mwldLsNssFsgsvfhffCdrpdepkqLgTLrLgNwFltGkVPdCwMsw-psLafleNN  
CF-9\_S.pim -----kn1q111LshNNIsGhIssaICN-----1kt111LDLgSNNLeGTIPqCvVERneyLshIsKn  
CF-4\_S.hab -----kn1qF11LshNNIsGhIssaICN-----1kt111LDLgSNNLeGTIPqCvVERneyLshIsKn  
LEPR3\_B.ju -----qpssleyYFSgANNFTGgIPsfICE-----1rsLTVLDLsNNkfngSPrcCgkfSsvLealRqN  
LEPR3\_B.na -----qpsslyYFSgANNFTGgIPsfICE-----1hsLi1LDLsNNrnfngSIPrcCvkgfSsvLealRqN  
LEPR3\_B.ra -----qpsslyYFSgANNFTGgIPsfICE-----1rsLTVLDLsNNkfngSPrcCgkfSsvLealRqN  
BAD68095.1 1htLdrLnLsSNRLHgnvPIp1tTtrdggV---11DYSSNsfssitr---DFGryLrnvyYlGfsrNkisGhIPsfICT---qcyleVLDLShNNfSGMVPsCLIQn-gdvtIReN  
AES86946.1 -SNLylvDLsFNkLqQp1sfIPkyA---f---Y1DYSSNkLss1Ihp---DIGMylp1ainilfLsNNsFkGeIdES1CN---assLr1LDLsYNNfdgkIPkCfat1SskLrMfegN  
GbVe\_G.bar tStLTVLDHGNLqLqg1dr1PqyAt---Y1DYSSNnfssv1Pr---DIGdflqfayFFS1sdNNFhGSPESICK---ssylqVLDLsNNSLSGSIPeCLIQmSvSLGVIRn  
LuVe11\_L.u -----raLpmt---YVDYShNFNGSIPA---EIsNyLS1a1FFSLsNNs1TGKIPtSICT---aefLqVLDLsNNNLdGSIPnCLHEnvslsVLRgN  
LuVe14\_L.u ---sLNVLDmHdNqLqGDvPIp1St---LpmtYVDYShNFNGSIPA---EIsNyLS1a1FFSLANNt1sGevPaSICT---aktLqVLDLsNNNLtGpIP-----  
LuVe12\_L.u ---sLFI1D1HdNqfQGD1PIiqsSp---f---hIDYSYn1fNGSIPtTnkartyLtnAnFFSLsNNr1rGaIPaSIC-----mdleeVLDfSNNNfndTIPdCLVgn-kwLaLIRgN  
LuVe13\_L.u ---rLNVLD1HdNqfQGD1PIiqsSp---f---hIDYSYn1fNGSIPtTykarnfhsWAnFFSLsNNr1rGaIPaSIC-----nnpLeVLDfSNMynfndTIPdCLarh-nwLaLIRgN  
mVe1\_M.lon -asLq1LDLHNSNRfKGDLHlfis-----pIGd1tps1yw1SLANNsFsgSPtS1CN---atqLgVLDLs1NqLSGdIapCLLEntgh1qVlgrN  
ACB99693.1 -asLq1LDLHNSNRfKGDLHlfis-----pIGd1tps1k11SLAKnsFsgSPtS1CN---amqLgVLDLs1NqLSGdIapCLLEntgh1qVlgrN  
CF-9\_S.pim nLNGvFDLHNSNkIGDLPpPSA---I---YVDYSSNnLnSIPI---DIGNsLa1AsFFSIANNs1TGmIPESICN---isyLqVLDLsNNkLSGTIPpCLLhNStsLGVlgrN  
StVe\_S.tor -SNLVLDLHNTNRLKGDL1pPSp---I---YVDYSSNnsNnSIPI---DIGKsLgFasFFSVANNgiTG1IPESICd---vsylqL1DfSNNaLSGTIPpCLLEySttLGVlgrN  
S1Ve1\_S.ly -SNLVLDLHNSNRKGDL1pPcTA---I---YVDYSSNnLnSIPI---DIGKsLgFasFFSVANNgiTG1IPESICN---csylqVLDfSNNaLSGTIPpCLLEySttLGVlgrN  
Ve1\_S.lyco -SNLVLDLHNSNRKGDL1pPcTA---I---YVnYSSNnLnSIPI---DIGKsLgFasFFSVANNgiTG1IPESICN---csylqVLDfSNNaLSGTIPpCLLEySttLGVlgrN  
AAT51733.1

HcrVf2\_M.f nLtgNvPmsm-gyldwLeslhlrNnHlyGeLPhSLqNctsLsVvd1seNgfSGSIP1Wigks1sgLnVnLRSNKfFeGDIP-----nevcy1ksLQI1D1AHNkLSGm1p-rcFhN1sA  
CF-9\_S.pim RLSGtIntTF-svgn1LRvisLhgNkltGKvPrSmINCKyLtl1d1GNMnLNDTFPnWL-gylfQk1LsLRSNK1HGpIk-----ssgntn1fmgLQI1D1sSngFSgn1perilgN1Qt  
CF-4\_S.hab RLSGtIntTF-svgn1LRvisLhgNkltGKvPrSmINCKyLtl1d1GNMnLNDTFPnWL-gylfQk1LsLRSNK1HGpIk-----ssgntn1fmgLQI1D1sSngFSgn1perilgN1Qt  
LEPR3\_B.ju RLSGr1Pkki---iSrgLksLDighNnfvGKLPPrSLIvssfLEVLNvesNRfNDTFPnWL-Ss1PeLqVLVLRsNaFhGpVh-----qtrfsKLR1D1IDIsHrFngtLp1dFfVnWtA  
LEPR3\_B.na RLSGr1Pkki---iSrgLksLDighNkLvGKLPPrSLIanssLEVLNvesNRfNDTFPnWL-Ss1PeLqVLVLRsNaFhGpVh-----qtrfsKLR1D1IDIsHrFngtLp1dFfVnWtA  
LEPR3\_B.ra RLSGr1Pkki---iSrgLksLDighNkLvGKLPPrSLIstssLEVLNvesNRfNDTFPnWL-Ss1PeLqVLVLRsNaFhGpVh-----qtrfsKLR1D1IDIsHrFngtLp1dFfVnWtA  
BAD68095.1 nfhgVLPkni-regCmfqT1DLnsNr1iGKLPPrSLskCKsLEVLdmgNMQ11DSFPCL-gNmsnLRVL1RSNQFyGSVglptesdatskyfsgLQI1D1ASNN1sLqSkwFen1Et  
AES86946.1 kLhGhIPDTf-PsPnCaLRyLnLndN1LdGSPKSLVNCK1LEVLNIGNfLSDrFPCL-SN1sLnRim1LRsNmHGSIG-----Cpnstgd1wemLQI1D1ASNNfngt1pavall1sNKA  
GbVe\_G.bar nLtgN1SDTF-PeNCL1qL1vLnN1LrGKvPKSLVsCKmLEVLd1GNMQ11NDTFPCL-kN1sSLRV1LRVLRgNKFngVh---Cs-ersp1p1mLQI1D1sSnsFSgrLhealc1stWKA  
LuVe11\_L.u RfngNIPDTf-qSCsLqL1DLsNqLeGrfPKSLsNCT1LEVLd1GNMRLSDhFPCL-kNktnLqVL1LRgNQFyGDIG---Cyn1s1nHekLQI1D1A1fNfSgeVnSrg1ttWEA  
LuVe14\_L.u nLSGdIPDTf-qSCsLk1L1DLsNqL1GK1PKSLNCTeLEVLd1GNMRLSDhFPCL-kNktnLqVL1LRgNQFyGDIG---Cyn1s1nHekLQI1D1A1fNfSgeVnSrg1ttWEA  
LuVe12\_L.u nLSGdIPDTf-qSCsLk1L1DLsNqL1GK1PKSLNCTeLEVLd1GNMRLSDhFPCL-qTikPnLRVL1RnN1LFHGSIG---Cphfpgt1hK1QI1D1A1fNfSgeVnSrg1ttWEA  
LuVe13\_L.u kLSGdIPDTf-qSCsLk1L1DLsNkfkGrvPKSLNCTeLEVLd1GNMRLSDhFPCL-qTikPnLRVL1RnN1LFHGSIG---Cphfpgt1hK1QI1D1A1fNfSgeVnSrg1ttWEA  
mVe1\_M.lon n1SGhIPDnF-PsqCgLnLDLnnNaiGK1PKSLsCmsLE1mVNGd1SDTFPCLm---pPSLsVLVLRsNRFHGeVt---Ce-rrgt1p1nLQI1D1sSNNfng1sLe1nFssWtA  
ACB99693.1 n1SGhI1DnF-PpqCgLnLDLnnNaiGK1PKSLsCmsLE1mVNGd1SDTFPCLm---pPSLsVLVLRsNRFHGeVt---Ce-rrgt1p1nLQI1D1sSNNfng1sLe1nFssWtA  
StVe\_S.tor RLhgV1PDf-P1gCaLKT1DLsNtfeGKLPKSLVNCK1LEVLNIGNfLSDrFPCL-SN1sLnRim1LRsNmHGSIG---Cpnstgd1wemLQI1D1ASNNfngt1pavall1sNKA  
S1Ve1\_S.ly RLhgV1PDf-P1dCaLNT1DLsNkLqGrLPKSLVNCK1LEVLNIGNfLSDrFPCL-Rn1sLnRVL1LRsNQFsgN1q---Cevt1n1s1p1nLQI1D1ASNNfngt1pavall1sNKA  
Ve1\_S.lyco kLNgV1PDfF-sigCaLqL1DLsNnLqGrLPKS1VNCK1LEVLNIGNfLSDrFPCL-Rn1sLnRVL1LRsNQFsgN1q---Cevt1n1s1p1nLQI1D1ASNNfngt1pavall1sNKA  
AAT51733.1 kLNgV1PDfF-sigCaLqL1DLsNnLqGrLPKS1VNCK1LEVLNIGNfLSDrFPCL-Rn1sLnRVL1LRsNQFsgN1q---Cevt1n1s1p1nLQI1D1ASNNfngt1pavall1sNKA

HcrVf2\_M.f M-anfsqs-----fs-----ptsfwmvasg-----1tENa1LvtKGMEHEytKILgfvkgmD1ScNfmyGeIPE1et1g1LALqYLNL  
CF-9\_S.pim M-keiDestgf-----peyisdpydiY-----Yny1t1stKGqdydsVr1ILdsnm1In1SkNRFEghIPs1IGd1vgLrtLNL  
CF-4\_S.hab M-keiDestgf-----peyisdpydiY-----Yny1t1stKGqdydsVr1ILdsnm1In1SkNRFEghIPs1IGd1vgLrtLNL  
LEPR3\_B.ju MHS1gkDedqSygyyM-----S1YY-----YfDSmvLmnKGvEMELVr1ItIYTA1DfSeNeFEGvIPs1IG1lkeL1VLNL  
LEPR3\_B.na MHf1gkngvqSngN1M-----gtSry-----YfDSmvLmnKGvEMELVr1ItIYTA1DfSeNeFEGvIPs1IG1lkeL1VLNL  
LEPR3\_B.ra MHS1gkDgdqSngN1M-----gtsy-----YfDSmvLmnKGvEMELVr1ItIYTA1DfSeNeFEGvIPs1IG1lkeL1VLNL  
BAD68095.1 M-MnsDgdqvlgiag-----iYKgl-----YQnNmivTfKGfD1mftK1L1t1fkm1D1SNndFngAPES1Gk1iALHgLNM  
AES86946.1 M-MrdEgvlrkelghLffdidnFhp1sfkallpd1dkhvsnm1lik1lanmsrsiidqeyakFkilarYQDT1iivnKGq1MnvVK1qstFTYVDMSSNylgGpIPDv1mrfkALnaLNL  
GbVe\_G.bar M-raaEset1Se1NML-----qFKvLk1NQFY-----YQDA1TVmKGLELE1L1K1ltVFTSID1sRnNfEGpIPEv1gtfKALVVLNF  
LuVe11\_L.u M-Mgdrngmdd---HL-----kFEpfqfTQ1Y-----YQDSt1v1tKGLqMEFVK1ltVFTAI1DfSSNnFEGpIPES1Gk1fnsLYVLNF  
LuVe14\_L.u M-Mgdrngmdd---HL-----kFEpfqfTQ1Y-----YQDSt1v1tKGLqMEFVK1ltVFTAI1DfSSNnFEGpIPES1Gk1fnsLYVLNF  
LuVe12\_L.u M-Migaeg1hd---HL-----kYEsVnsTd-----YEnS1TVssKGLqrE1VK1LkVFKS1DfSSNnFDGqIPeVmgKf1AvqVLNL  
LuVe13\_L.u M-Migaegmhd---HL-----eYKsfnnTd-----YEvS1TVssKGLqrE1VK1LkVFKS1DfSSNnFDGqIPeVmgKf1AvqVLNL  
mVe1\_M.lon M-VlmsDarfTqr-Hw-----gtfnfLsaSQFY-----YtaAvALT1KrVELELVK1wpdF1AVD1ScndFhgdIPDA1Gd1LtsLYVLNI  
ACB99693.1 M-VlmsDarfTqr-Hs-----gtfnfLwtSQFY-----YtaAvALT1KrVELELVK1wpdF1AVD1ScndFhgdIPDA1Gd1LtsLYVLNI  
StVe\_S.tor M-1vahOnveTahNHI-----qYKf1q1SnEY-----YQDTVTL1K1GHELELVK1LrVFTSIDfSSNRfGmIPDTV1Gd1LtsLYVLNI  
S1Ve1\_S.ly M-1vahDDyveTgrNHI-----qYKf1q1SnEY-----YQDTVTL1K1GHELELVK1LrVFTSIDfSSNRfGmIPDTV1Gd1LtsLYVLNI  
Ve1\_S.lyco M-1vahDDyveTgrNHI-----qYKf1q1Sk1Y-----YQDTVTL1K1GHELELVK1LrVFTSIDfSSNRfGmIPDA1Gd1LtsLYVLNI  
AAT51733.1 M-1vahDDyveTgrNHI-----qYKf1q1SnEY-----YQDTVTL1K1GHELELVK1LrVFTSIDfSSNRfGmIPDTV1Gd1LtsLYVLNI



HcrVf2\_M.f SñNrFTGrIPsKiGsmagLESLOfSmNqLdGEIPsmtiLTFhshNLNSYNNLTGRIPes tQlQsldqsSFvGN-eLcGaPLNKnCsengvippPtvehdggggyslvedEwfyVyslgVG  
Cf-9\_S.pim SHNvleGHIPaSFqNLsVLESLOLSsNKiSGEIPQqLASLTFLeVLNLSHnHVGcIPKqQFdsFgntSyQGndGLrGfPLsKlCggedqvttPaeldqeeEeEdSpmisWqgVlvgyG  
Cf-4\_S.hab SHNvleGHIPaSFqNLsVLESLOLSsNKiSGEIPQqLASLTFLeVLNLSHnHVGcIPKqQFdsFgntSyQGndGLrGfPLsKlCggedqvttPaeldqeeEeEdSpmisWqgVlvgyG  
LEPR3\_B.ju SgNAFTGHIPSSmGNLSsLESLOLSRNKLTGaIPQEL-----VLHl-----dsrwdt-----  
LEPR3\_B.na SgNAFTGrIPSSmGNLSsLESLOLSRNKLTGEIPQELgNLsyLaymNFShNqLVGlVPgG tQFRTqpcsSFkdNPGLfGpsLNqaCvdihgktsqpsmSkeEeEdgqeevisWIAAAIG  
LEPR3\_B.ra SgNsFTsHIPSSmGNLSsLESLOLSRNKLTGaIPQELgNLsyLaymNFShNqLVGlVPgG tQFRTqpcsSFkdNPGLyGpsLdqaCvdihgktsqpselSkeEeEdgqeevisWIAAAIG  
BAD68095.1 SrNsFTGrIPsKiGkLvqLESLOLSInqLSeaiPQELASLTsLAIlnNLSYNNLTGQIPqG tQFIsFgnrSFEGNaGLCGrPLsKqCnysgleaarsp-sSsrD---SvgiilFVFvgsG  
AES86946.1 SHNAITGHIPSSveNLkhLESMDLSnNsLnGEIPQqLSLsFLaymNLSFNhLVGRIP1G tQlQTFdvDSFaGNeGLCGpPLtKiCeppqa-----setphsQnesfvEwsFIsielG  
GbVe\_G.bar SHNAFTGsIPsS1GNLSqLESLOLSsNsfdGEIPiqlANLnFisfLNvSnNkLeGQIPrs tQlQsFSeasFENkGLCG1PLttCvngtspkp-----rTtqEfQpAdefDwQFIFigVG  
LuVe11\_L.u SHNsFTGrIPsVFGNLsQLESsDLSnNKLTGQIPQELteLTFLSaNLNSYNhLVGRIPtGr tQFQTFensSFEGNPnLCGnPtFKsCsdiivt-----ppaqKesgkpsidWeFivpgIG  
LuVe14\_L.u SHNgFTGeIPStlGNvSgLESLOLSnNKLTGrIPsalteLTFLSaNLNSYNhLVGRIPtGr tQFQTFensSFEGNPnLCGnPtFKsCsdiivt-----ppaqKesgkpsidWeFivpgIG  
LuVe12\_L.u SHNAFTGHIPsAfGdLSnmESLOLSHnKkGhIPdELtgmKFLeVLNLSdNNLVGRIPtG tQFQTFdntSFgaNPdLCGiPLtKnCtpsspvhgdat-isHen--hSsrVdWdlismAfG  
LuVe13\_L.u SHNdFTGHIPsAfGdLSnmESLOLSHnKkGhIPEELtgmKFLeVLNLSdNNLVGRIPtG tQFQTFdntSFgaNPdLCGiPLtKnCtpsspvhgdat-isHen--hSsrVdWdlismAfG  
mVe1\_M.lon SHNAIGGsIPKsIGqLSKLESLOLSRNRLSghvPtELggLTFLsVLNLSYNhLVGeIPnGrQmhTFSaDaFKGNaGLCGrhLeRnCsd-----rSgEiEieneiEwVYFvALG  
ACB99693.1 SHNAIGGsIPsFghLSrLESLOLSRNqLTghvPtELggLTFLsVLNLSYNhLVGeIPnGrQmhTFSaDaFKGNaGLCGrPLeRnCsd-----rSgEiEieneiEwVYFvALG  
StVe\_s.tor SyNAleGPtPKsVgkLqmLESLOLSnHLSGEIPsELASLTFLAaLNvSFNNLFgKIPqG iQlQTFsGDSFEGnRGLCGfPLsnsCksdase----lTpapssqddsYDwQFIFkgVG  
S1Ve1\_S.ly SHNAleGPtPKsIGkLqmLESLOLSRNHLSGEIPsELASLTFLAaLNLSFNkfFGKIPst tQFQTFsGDSFEGNsGLCG1PLNdsCqngses----lpp1tsQdsddEwFIFAAGV  
Ve1\_S.lyco SHNAleGPtPKsIGkLqmLESLOLSnHLSGEIPsELASLTFLAaLNLSFNkfFGKIPst tQFQTFsGDSFEGNsGLCG1PLNdsCqngses----lpp1tsQdsddEwFIFAAGV  
AAT51733.1 SHNAleGPtPKsIGkLqmLESLOLSnHLSGEIPsELASLTFLAaLiLSFNnLFgKIPst tQF1TFsGDSFEGNRLCG1PLNdsCeskrsefmPlq-ts1Pe-----sdfEwFIFAAGV

HcrVf2\_M.f FftGfwivlgsLLvnmplis-illsqllnRivlkmYhviveyv-----  
Cf-9\_S.pim cglvlglsViyIMwstqYp-awF-srmDlklehiittkmKkhkKry-----  
Cf-4\_S.hab cglvlglsViyIMwstqYp-awF-srmDlklehiittkmKkhkKry-----  
LEPR3\_B.ju -----  
LEPR3\_B.na FipGiAfgtmeyimvSYKPeWf-----inlfgrtkrRisttrr-----  
LEPR3\_B.ra FipGiAfgtmeyimvSYKPeWf-----inlfgrtkrRisttrr-----  
BAD68095.1 F-----ktnDlsVqEhmldlgs-----  
AES86946.1 FffGfgvflPVfclWkkIR-lWYskHVDemLyRf1PrldfvyeqhegkRyktLkmy-----  
GbVe\_G.bar FgVGAAIfVaPLIFWkTas-kWvDeiVDKilevvlPk1g-RtytcpgdRkvdedenLEEdnKgsDeEdeqsqettEeFhGRYCVFCsKLDqTRKkAIHd1sCTCyDSSsspsSstspff  
LuVe11\_L.u iivVGfavlPaLlWprFR-nWYwprIDS1liavFPqfrshkanatrrRagerRsg-----  
LuVe14\_L.u FgaGAAIaVaPLlFskkan-kWLDdHIDRil1vl1PlfgrlytsndwRrvqpeeildhyvyfydDDEEDEdesydeFfGkYCYyCtKLDaTRtmAIHDPKCTCrhSrtgstFSspfsSt  
LuVe12\_L.u YvfglgaImPaailWsSFR-iWYwpkVDyLLvwmFPklytKdwnnrlvRtrkKksi-----ikDdk-----piilnh  
LuVe13\_L.u YvfglgaImPaailWsSFR-iWYwpkVDyLLvwmFPklytKdwnnrlvRtrkKksi-----ikDdk-----piilnh  
mVe1\_M.lon YvVGlgiiVvllLFcrSFR-ykYfdkIDKvvqetFdardrRrrRngtRivrnqvvrsh-----inDgk-----A-nly  
ACB99693.1 YvVGlgiiVvllLFcrSFR-ykYfdkIDKvvqetFdardrRrrRngtRivrnqvvrsh-----inDgk-----A-nly  
StVe\_s.tor YgVGAAVsIaPLLFYkrgr-kycDkHleRmLkImFPrfgfytRfhpkgkvavehyeDEt---pDDtEDDDEggkEas1GRYCVFCsKLDqRKaAIHDPKCTChmSSslisFplApsSs  
S1Ve1\_S.ly YlVGAAntIsVwFYkpvK-kWFDkHaeKvllwFsr-----  
Ve1\_S.lyco YlVGAAntIsVwFYkpvK-kWFDkHmeKcllwFsrk-----  
AAT51733.1 YlVGAAntIsVwFYkpvK-kWFDkHmeKcllwFsrk-----

HcrVf2\_M.f -----  
Cf-9\_S.pim -----  
Cf-4\_S.hab -----  
LEPR3\_B.ju -----  
LEPR3\_B.na -----  
LEPR3\_B.ra -----  
BAD68095.1 -----  
AES86946.1 -----  
GbVe\_G.bar sp-----  
LuVe11\_L.u -----  
LuVe14\_L.u tt-----  
LuVe12\_L.u Hm-----  
LuVe13\_L.u Hm-----  
mVe1\_M.lon -----  
ACB99693.1 -----  
StVe\_s.tor sp1lvichkkf-----  
S1Ve1\_S.ly -----  
Ve1\_S.lyco -----  
AAT51733.1 -----

**Figure S2.** Phylogram showing evolutionary relationships between Ve1 homologs (clade B) including candidates proteins in flax, determined by using maximum-likelihood method. Branch lengths are proportional to evolutionary distances, branch values > 0.6 are given at the node to indicate the branch support. In addition, other Ve1 homologs were added to the tree including HLVe1-2A (*Humus lupulus*; Genebank accession: AIE39594.1); HLVe1-2B (*Humus lupulus*; Genebank accession: AIE39594.1), NgVe1 (*Nicotiana glutinosa*, Genebank accession: ALK26499.1), CaVe (*Capsicum annum* var. *annuum*, Genebank accession: AZY92102.1), StuVe1 (*Solanum tuberosum*, Genebank accession: ALK26501.1), StuVe2 (*Solanum tuberosum*, Genebank accession: ALK26503.1), and Ve2 (*Solanum lycopersicum*, Genebank accession: AAK58012.1). Some of them were tested for *Verticillium* resistance (Song *et al.*, 2017), Ve1 homologs providing resistance are indicated in (1) or not in (2).

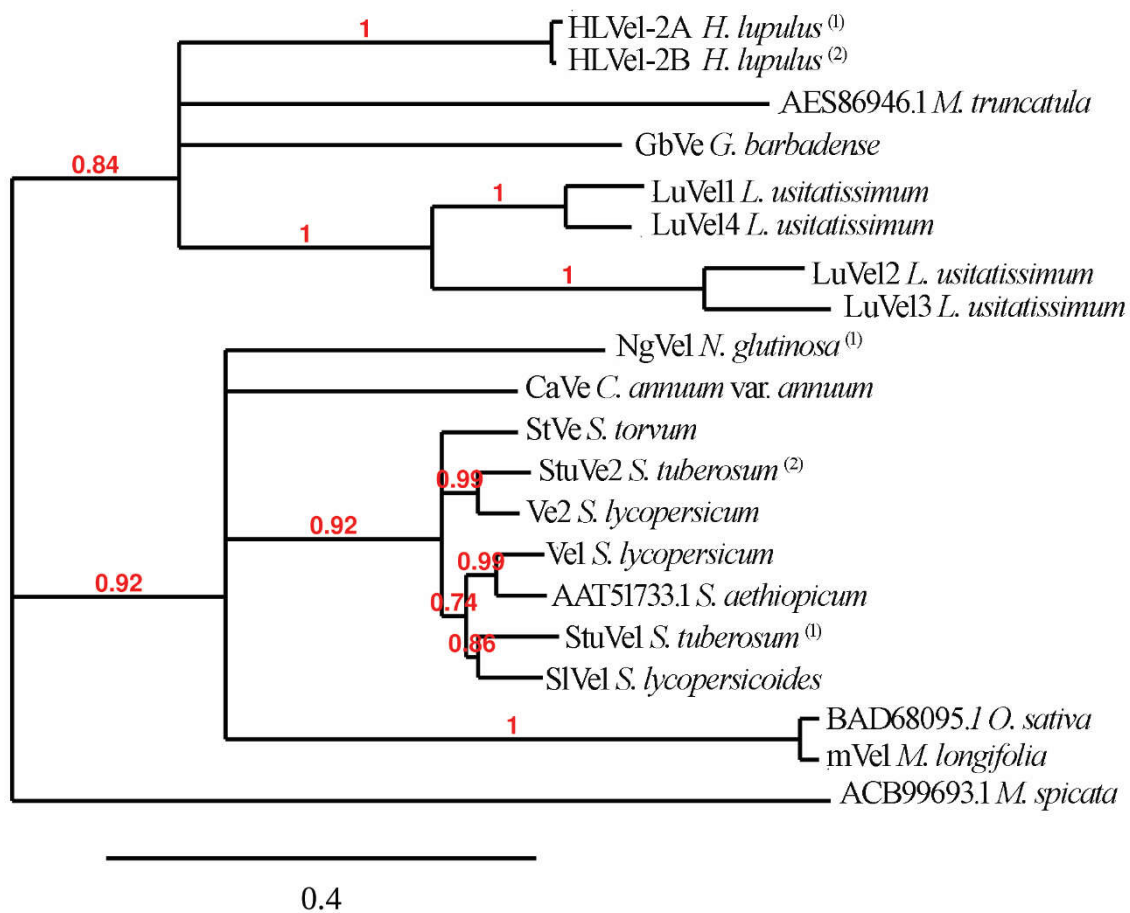

**Figure S3.** Secondary structure predictions of LuVe11 (up) and Ve1 (down). Colored amino acids indicate structural elements: in grey for coil, in pink for  $\alpha$ -helix, in yellow for  $\beta$ -strand and in white for transmembrane segment. Segments B1 to B8 are boxed in green, B20 to B23 in blue and B32 to B37 in red.

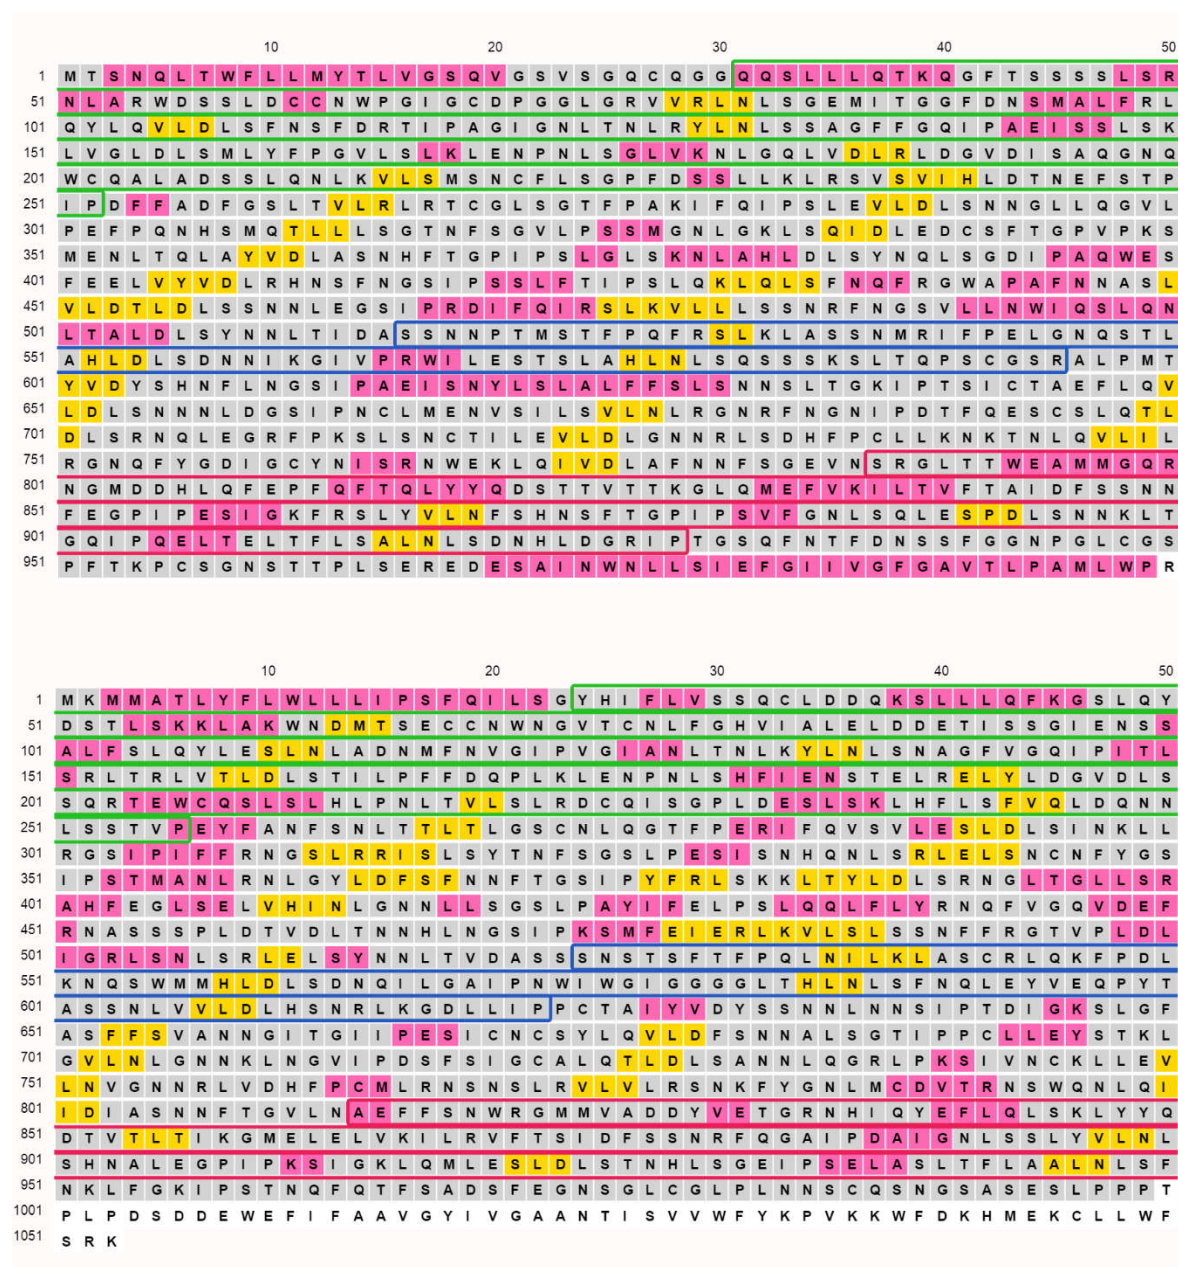

**Table S1.** Prediction of peptide signal and subcellular localization within the four proteins in flax and Ve1. Values indicate location of each fragment.

| Prediction<br>Sequence | Signal<br>peptide | Non cytoplasmic | Transmembrane        | Cytoplasmic           |
|------------------------|-------------------|-----------------|----------------------|-----------------------|
| LuVe11                 | 1->25             | 26->974         | 975->998             | 999->1039             |
| LuVe14                 | 1->23             | 24->933         | 934->954<br>966->983 | 955->965<br>984->1061 |
| LuVe12                 | 1->23             | 24->1016        | 1017->1038           | 1039->1090            |
| LuVe13                 | 1->23             | 24->994         | 995->1016            | 1017->1067            |
| Ve1                    | 1->23             | 24->1010        | 1011->1032           | 1033->1053            |
